# Supplementary material for: Estimation of Protein and Amino Acid Requirements in Layer Chicks Depending on Dynamic Model
Source: MDPI journal article supplement (doi:10.3390/ani14050764), 2024-02-29
Supplement: s1 [file s1]

**Table S1.** Composition and nutritional values of the basal diet

| item                                    | Day 0-14 | Day 15-42 |
|-----------------------------------------|----------|-----------|
| Ingredient, %                           |          |           |
| Corn                                    | 52.11    | 54.07     |
| Soybean meal                            | 34.00    | 31.35     |
| Wheat bran                              | 2.50     | 3.20      |
| Soybean oil                             | 4.00     | 4.00      |
| CaHPO <sub>4</sub>                      | 0.50     | 0.46      |
| CaCO <sub>3</sub>                       | 2.18     | 2.24      |
| Salt                                    | 0.42     | 0.42      |
| Lysine                                  | 0.07     | 0.03      |
| Methionine                              | 0.17     | 0.17      |
| Cystine                                 | 0.05     | 0.04      |
| Threonine                               | -        | 0.02      |
| Vitamin and mineral premix <sup>1</sup> | 4        | 4         |
| Total                                   | 100      | 100       |
| Nutrient composition <sup>2</sup>       |          |           |
| ME, MJ/kg                               | 2.88     | 2.89      |
| Crude protein, %                        | 19.92    | 19.02     |
| Lysine, %                               | 1.10     | 1.01      |
| Methionine, %                           | 0.46     | 0.45      |
| Methionine+Cysteine, %                  | 0.84     | 0.81      |
| Threonine, %                            | 0.75     | 0.73      |
| Na, %                                   | 0.18     | 0.18      |
| Cl, %                                   | 0.30     | 0.30      |
| Ca, %                                   | 1.00     | 1.00      |
| Available Phosphorus, %                 | 0.46     | 0.45      |

<sup>1</sup>Vitamin and mineral premix provided/kg diet: iron, 100 mg; copper, 8 mg;

manganese, 20 mg; zinc, 100 mg; selenium, 0.3 mg; iodine, 0.7 mg; retinyl acetate, 10280 IU; cholecalciferol 2280 IU; dl- $\alpha$ -tocopheryl acetate, 17.12 mg; menadione, 6.82 mg; thiamin, 2.28 mg; riboflavin, 5.68 mg; pantothenic acid, 12.25 mg; pyridoxine, 2.28 mg; niacin, 22.84 mg; biotin, 0.18 mg; folic acid, 1.12 mg.

<sup>2</sup>Calculated.

**Table S2.** Composition and nutritional values of the nitrogen-free diet and low-nitrogen diet

| Item                                    | Nitrogen-free | Low-nitrogen |
|-----------------------------------------|---------------|--------------|
| Ingredient(%)                           |               |              |
| Corn starch                             | 67.50         | 57.50        |
| Glucose                                 | 19.90         | 22.9         |
| Cellulose                               | 3.00          | 4.40         |
| Soybean oil                             | 1.60          | 1.60         |
| CaHPO <sub>4</sub>                      | 2.65          | 2.60         |
| CaCO <sub>3</sub>                       | 0.90          | 0.90         |
| Casein                                  | -             | 5.65         |
| Salt                                    | 0.45          | 0.45         |
| Vitamin and mineral premix <sup>1</sup> | 4             | 4            |
| Total                                   | 100           | 100          |
| Nutrient composition <sup>2</sup>       |               |              |
| ME, MJ/kg                               | 2.88          | 2.89         |
| Crude protein, %                        | 0.26          | 5.01         |
| Lysine, %                               | -             |              |
| Methionine, %                           | -             | 0.15         |
| Methionine+Cysteine, %                  | -             | 0.17         |
| Threonine, %                            | -             | 0.21         |
| Na, %                                   | 0.18          | 0.18         |
| Cl, %                                   | 0.27          | 0.28         |
| Ca, %                                   | 0.90          | 0.91         |
| Available Phosphorus, %                 | 0.46          | 0.46         |

<sup>1</sup>Vitamin and mineral premix provided/kg diet: iron, 100 mg; copper, 8 mg; manganese, 20 mg; zinc, 100 mg; selenium, 0.3 mg; iodine, 0.7 mg; retinyl acetate, 10280 IU; cholecalciferol 2280 IU; dl-a-tocopheryl acetate, 17.12 mg; menadione, 6.82 mg; thiamin, 2.28 mg; riboflavin, 5.68 mg; pantothenic acid, 12.25 mg; pyridoxine, 2.28 mg; niacin, 22.84 mg; biotin, 0.18 mg; folic acid, 1.12 mg.

<sup>2</sup>Calculated.

**Table S3.** Live weight and corresponding body composition of Jing Tint 6 chicks at different days of age <sup>1</sup>

| Days of age                   | 0              | 7              | 14             | 21              | 28              | 35              | 42              |
|-------------------------------|----------------|----------------|----------------|-----------------|-----------------|-----------------|-----------------|
| Body weight, g                | 37.65±<br>0.02 | 56.77±<br>0.71 | 96.63±<br>0.91 | 145.93<br>±0.99 | 202.52<br>±1.17 | 287.83<br>±5.14 | 391.82<br>±6.58 |
| Carcass/body weight, %        | 96.18±<br>0.10 | 96.37±<br>0.09 | 96.96±<br>0.11 | 97.04±<br>0.07  | 96.34±<br>0.13  | 95.78±<br>0.12  | 93.51±<br>0.29  |
| Feather/body weight, %        | 3.82±0.<br>10  | 3.63±0.<br>09  | 3.04±0.<br>11  | 2.96±0.<br>07   | 3.66±0.<br>14   | 4.22±0.<br>12   | 6.49±0.<br>30   |
| Carcass protein<br>content, % | 15.18±<br>0.19 | 15.00±<br>0.13 | 16.61±<br>0.34 | 18.17±<br>0.14  | 18.30±<br>0.24  | 18.42±<br>0.22  | 17.77±<br>0.26  |
| Feather protein<br>content, % | 87.79±<br>0.46 | 87.89±<br>0.62 | 88.72±<br>0.57 | 87.10±<br>0.59  | 87.06±<br>0.65  | 86.55±<br>0.50  | 85.75±<br>0.95  |
| Total carcass protein, g      | 4.80±0.<br>11  | 7.11±0.<br>21  | 15.14±<br>0.51 | 25.66±<br>0.22  | 36.26±<br>0.48  | 48.11±<br>0.71  | 64.19±<br>1.89  |
| Total feather protein, g      | 1.26±0.<br>03  | 1.81±0.<br>04  | 2.62±0.<br>11  | 3.76±0.<br>10   | 6.46±0.<br>26   | 10.49±<br>0.31  | 21.90±<br>1.22  |

<sup>1</sup> Values are means ± SE, n = 6.

**Table S4.** Amino acid pattern of protein (% of protein) in de-feathered carcasses of Jing Tint 6 chicks <sup>1</sup>

| Days of Age         | Aspartic acid           | Threonine               | Serine                  | Glutamic acid           | Glycine                | Alanine                 | Valine                 | Cysteine               | Methionine              | Isoleucine              | Leucine                | Tyrosine               | Phenylalanine           | Histidine               | Lysine                  | Arginine                | Proline                | Tryptophan             |
|---------------------|-------------------------|-------------------------|-------------------------|-------------------------|------------------------|-------------------------|------------------------|------------------------|-------------------------|-------------------------|------------------------|------------------------|-------------------------|-------------------------|-------------------------|-------------------------|------------------------|------------------------|
| 0                   | 7.25±0.07 <sup>a</sup>  | 4.36±0.05 <sup>a</sup>  | 4.90±0.15 <sup>a</sup>  | 13.23±0.43 <sup>a</sup> | 7.65±0.09 <sup>a</sup> | 7.92±0.13 <sup>a</sup>  | 4.25±0.12 <sup>a</sup> | 1.97±0.25 <sup>a</sup> | 2.65±0.08 <sup>ab</sup> | 3.70±0.07 <sup>ab</sup> | 6.62±0.17 <sup>a</sup> | 2.59±0.06 <sup>b</sup> | 3.88±0.08 <sup>c</sup>  | 2.30±0.06 <sup>ab</sup> | 5.04±0.06 <sup>b</sup>  | 5.31±0.06 <sup>ab</sup> | 5.61±0.13 <sup>a</sup> | 0.90±0.03 <sup>c</sup> |
|                     |                         |                         |                         |                         |                        |                         |                        |                        |                         |                         |                        |                        |                         |                         |                         |                         |                        |                        |
| 7                   | 7.69±0.32 <sup>ab</sup> | 3.55±0.23 <sup>ab</sup> | 3.42±0.35 <sup>b</sup>  | 11.48±0.59 <sup>b</sup> | 7.25±0.51 <sup>a</sup> | 6.77±0.45 <sup>b</sup>  | 4.32±0.22 <sup>a</sup> | 1.90±0.15 <sup>a</sup> | 2.61±0.06 <sup>ab</sup> | 3.87±0.14 <sup>b</sup>  | 6.87±0.35 <sup>a</sup> | 2.87±0.14 <sup>c</sup> | 3.88±0.05 <sup>c</sup>  | 1.90±0.17 <sup>a</sup>  | 5.64±0.31 <sup>a</sup>  | 5.69±0.42 <sup>a</sup>  | 5.62±0.30 <sup>a</sup> | 0.72±0.03 <sup>b</sup> |
|                     |                         |                         |                         |                         |                        |                         |                        |                        |                         |                         |                        |                        |                         |                         |                         |                         |                        |                        |
| 14                  | 7.01±0.12 <sup>b</sup>  | 3.90±0.29 <sup>ab</sup> | 4.15±0.39 <sup>ab</sup> | 11.74±0.36 <sup>b</sup> | 7.01±0.42 <sup>a</sup> | 7.46±0.50 <sup>ab</sup> | 4.00±0.09 <sup>a</sup> | 2.14±0.25 <sup>a</sup> | 2.65±0.05 <sup>ab</sup> | 3.55±0.08 <sup>ac</sup> | 6.33±0.21 <sup>b</sup> | 2.56±0.05 <sup>b</sup> | 3.64±0.09 <sup>ac</sup> | 2.35±0.20 <sup>b</sup>  | 5.28±0.11 <sup>ab</sup> | 5.26±0.22 <sup>ab</sup> | 5.69±0.20 <sup>a</sup> | 0.58±0.07 <sup>a</sup> |
|                     |                         |                         |                         |                         |                        |                         |                        |                        |                         |                         |                        |                        |                         |                         |                         |                         |                        |                        |
| 21                  | 6.25±0.05 <sup>c</sup>  | 3.66±0.05 <sup>ab</sup> | 3.51±0.10 <sup>b</sup>  | 11.71±0.21 <sup>b</sup> | 7.10±0.08 <sup>a</sup> | 7.00±0.08 <sup>ab</sup> | 4.37±0.09 <sup>a</sup> | 1.86±0.16 <sup>a</sup> | 2.51±0.12 <sup>b</sup>  | 3.51±0.04 <sup>ac</sup> | 6.18±0.06 <sup>b</sup> | 2.03±0.03 <sup>a</sup> | 3.45±0.05 <sup>ab</sup> | 2.88±0.04 <sup>c</sup>  | 4.92±0.06 <sup>bc</sup> | 5.04±0.13 <sup>b</sup>  | 4.15±0.05 <sup>b</sup> | 0.53±0.03 <sup>a</sup> |
|                     |                         |                         |                         |                         |                        |                         |                        |                        |                         |                         |                        |                        |                         |                         |                         |                         |                        |                        |
| 28                  | 6.10±0.11 <sup>c</sup>  | 3.72±0.15 <sup>b</sup>  | 3.53±0.14 <sup>b</sup>  | 11.45±0.21 <sup>b</sup> | 7.38±0.16 <sup>a</sup> | 7.28±0.24 <sup>ab</sup> | 3.42±0.17 <sup>b</sup> | 1.56±0.15 <sup>a</sup> | 2.63±0.06 <sup>ab</sup> | 3.41±0.04 <sup>c</sup>  | 5.75±0.19 <sup>b</sup> | 2.03±0.05 <sup>a</sup> | 3.36±0.06 <sup>ab</sup> | 3.02±0.11 <sup>c</sup>  | 4.56±0.06 <sup>c</sup>  | 4.80±0.16 <sup>b</sup>  | 4.59±0.16 <sup>b</sup> | 0.70±0.03 <sup>b</sup> |
|                     |                         |                         |                         |                         |                        |                         |                        |                        |                         |                         |                        |                        |                         |                         |                         |                         |                        |                        |
| 35                  | 6.04±0.13 <sup>c</sup>  | 3.63±0.09 <sup>ab</sup> | 3.49±0.15 <sup>b</sup>  | 11.35±0.24 <sup>b</sup> | 6.80±0.11 <sup>a</sup> | 6.74±0.24 <sup>b</sup>  | 2.75±0.33 <sup>c</sup> | 1.85±0.20 <sup>a</sup> | 2.48±0.06 <sup>b</sup>  | 3.54±0.07 <sup>ac</sup> | 6.24±0.19 <sup>b</sup> | 2.05±0.10 <sup>a</sup> | 3.43±0.09 <sup>ab</sup> | 2.92±0.03 <sup>c</sup>  | 5.05±0.09 <sup>b</sup>  | 4.68±0.04 <sup>b</sup>  | 4.22±0.12 <sup>b</sup> | 0.72±0.01 <sup>b</sup> |
|                     |                         |                         |                         |                         |                        |                         |                        |                        |                         |                         |                        |                        |                         |                         |                         |                         |                        |                        |
| 42                  | 5.94±0.08 <sup>c</sup>  | 3.42±0.10 <sup>b</sup>  | 3.58±0.10 <sup>b</sup>  | 11.21±0.4 <sup>b</sup>  | 6.92±0.28 <sup>a</sup> | 6.67±0.26 <sup>b</sup>  | 3.70±0.12 <sup>c</sup> | 2.22±0.34 <sup>a</sup> | 2.78±0.06 <sup>a</sup>  | 3.41±0.04 <sup>c</sup>  | 5.81±0.09 <sup>b</sup> | 2.10±0.06 <sup>a</sup> | 3.19±0.01 <sup>b</sup>  | 2.84±0.07 <sup>c</sup>  | 4.81±0.17 <sup>bc</sup> | 4.88±0.16 <sup>b</sup>  | 4.23±0.08 <sup>b</sup> | 0.57±0.03 <sup>a</sup> |
|                     |                         |                         |                         |                         |                        |                         |                        |                        |                         |                         |                        |                        |                         |                         |                         |                         |                        |                        |
| Average of 0-2 week | 7.32±0.20               | 4.01±0.11               | 4.31±0.21               | 12.42±0.24              | 7.23±0.12              | 7.63±0.11               | 4.17±0.12              | 2.01±0.12              | 2.63±0.04               | 3.71±0.09               | 6.61±0.16              | 2.67±0.10              | 3.80±0.08               | 2.23±0.07               | 5.32±0.17               | 5.42±0.13               | 5.65±0.04              | 0.73±0.04              |
| Average of 3-6 week | 6.08±0.06               | 3.52±0.07               | 3.47±0.05               | 11.29±0.15              | 6.84±0.09              | 6.78±0.10               | 3.26±0.30              | 1.87±0.12              | 2.60±0.04               | 3.46±0.04               | 6.01±0.12              | 2.14±0.06              | 3.36±0.06               | 2.77±0.08               | 4.84±0.09               | 4.75±0.10               | 4.38±0.15              | 0.63±0.02              |

<sup>1</sup> Values are means ± SE, n = 6. Means in a row with different superscripts are different, *P* < 0.05.

**Table S5.** Amino acid pattern of protein (% of protein) in feather of Jing Tint 6 chicks <sup>1</sup>

| Days of Age         | Aspartic acid           | Threonine               | Serine                  | Glutamic acid           | Glycine                 | Alanine                | Valine                   | Cystine                  | Methionine             | Isoleucine             | Leucine                | Tyrosine                | Phenylalanine           | Histidine              | Lysine                  | Arginine                | Proline                 | Tryptophan             |
|---------------------|-------------------------|-------------------------|-------------------------|-------------------------|-------------------------|------------------------|--------------------------|--------------------------|------------------------|------------------------|------------------------|-------------------------|-------------------------|------------------------|-------------------------|-------------------------|-------------------------|------------------------|
| 0                   | 4.02±0.23 <sup>c</sup>  | 2.35±0.13 <sup>c</sup>  | 4.96±0.35 <sup>c</sup>  | 5.40±0.30 <sup>c</sup>  | 3.26±0.26 <sup>c</sup>  | 2.26±0.22 <sup>a</sup> | 4.25±0.26 <sup>d</sup>   | 6.11±0.31 <sup>a</sup>   | 0.85±0.08 <sup>a</sup> | 2.61±0.16 <sup>a</sup> | 4.25±0.24 <sup>a</sup> | 2.42±0.16 <sup>ab</sup> | 2.93±0.14 <sup>c</sup>  | 0.65±0.08 <sup>a</sup> | 1.18±0.14 <sup>a</sup>  | 3.94±0.49 <sup>a</sup>  | 7.45±0.06 <sup>ab</sup> | 0.60±0.03 <sup>a</sup> |
| 7                   | 5.69±0.19 <sup>ab</sup> | 3.35±0.12 <sup>a</sup>  | 7.69±0.17 <sup>ab</sup> | 8.64±0.17 <sup>ab</sup> | 5.42±0.23 <sup>ab</sup> | 4.17±0.27 <sup>b</sup> | 5.28±0.18 <sup>ab</sup>  | 6.80±0.30 <sup>abc</sup> | 0.81±0.05 <sup>a</sup> | 3.38±0.15 <sup>b</sup> | 5.58±0.22 <sup>b</sup> | 2.76±0.17 <sup>a</sup>  | 3.80±0.14 <sup>a</sup>  | 0.98±0.09 <sup>b</sup> | 1.40±0.08 <sup>ab</sup> | 5.24±0.34 <sup>b</sup>  | 8.33±0.33 <sup>ab</sup> | 0.46±0.03 <sup>b</sup> |
| 14                  | 6.08±0.20 <sup>b</sup>  | 3.59±0.10 <sup>ab</sup> | 7.59±0.29 <sup>ab</sup> | 8.60±0.26 <sup>ab</sup> | 5.77±0.19 <sup>a</sup>  | 4.16±0.48 <sup>b</sup> | 5.58±0.19 <sup>abc</sup> | 6.85±0.23 <sup>abc</sup> | 0.87±0.05 <sup>a</sup> | 3.30±0.10 <sup>b</sup> | 5.63±0.19 <sup>b</sup> | 1.99±0.08 <sup>b</sup>  | 3.59±0.13 <sup>ab</sup> | 0.89±0.05 <sup>b</sup> | 1.70±0.07 <sup>cd</sup> | 5.59±0.21 <sup>b</sup>  | 8.17±0.29 <sup>ab</sup> | 0.37±0.02 <sup>c</sup> |
| 21                  | 5.42±0.14 <sup>a</sup>  | 3.32±0.10 <sup>a</sup>  | 7.45±0.26 <sup>a</sup>  | 9.19±0.23 <sup>a</sup>  | 4.93±0.15 <sup>b</sup>  | 4.93±0.15 <sup>b</sup> | 5.07±0.14 <sup>a</sup>   | 6.74±0.20 <sup>abc</sup> | 0.86±0.03 <sup>a</sup> | 3.48±0.17 <sup>b</sup> | 5.34±0.15 <sup>b</sup> | 2.10±0.08 <sup>b</sup>  | 3.38±0.09 <sup>b</sup>  | 0.63±0.03 <sup>a</sup> | 1.54±0.08 <sup>bc</sup> | 4.58±0.14 <sup>ab</sup> | 7.94±0.17 <sup>ab</sup> | 0.31±0.02 <sup>c</sup> |
| 28                  | 3.20±0.11 <sup>d</sup>  | 1.98±0.10 <sup>d</sup>  | 4.19±0.30 <sup>d</sup>  | 4.92±0.48 <sup>c</sup>  | 2.88±0.43 <sup>c</sup>  | 2.73±0.65 <sup>a</sup> | 3.86±0.20 <sup>d</sup>   | 6.60±0.35 <sup>ab</sup>  | 0.86±0.04 <sup>a</sup> | 2.65±0.32 <sup>a</sup> | 3.95±0.30 <sup>a</sup> | 2.33±0.21 <sup>ab</sup> | 2.46±0.17 <sup>d</sup>  | 0.22±0.02 <sup>c</sup> | 0.91±0.05 <sup>c</sup>  | 3.68±0.69 <sup>a</sup>  | 7.97±0.60 <sup>ab</sup> | 0.30±0.01 <sup>c</sup> |
| 35                  | 5.80±0.27 <sup>ab</sup> | 3.61±0.11 <sup>ab</sup> | 7.24±0.16 <sup>a</sup>  | 8.28±0.16 <sup>b</sup>  | 5.20±0.07 <sup>ab</sup> | 5.07±0.16 <sup>b</sup> | 5.73±0.14 <sup>bc</sup>  | 7.67±0.35 <sup>c</sup>   | 0.89±0.05 <sup>a</sup> | 3.64±0.04 <sup>b</sup> | 6.00±0.05 <sup>b</sup> | 2.61±0.11 <sup>a</sup>  | 3.64±0.02 <sup>ab</sup> | 0.62±0.01 <sup>a</sup> | 1.82±0.04 <sup>d</sup>  | 5.28±0.16 <sup>b</sup>  | 8.03±0.22 <sup>ab</sup> | 0.31±0.02 <sup>c</sup> |
| 42                  | 5.87±0.08 <sup>ab</sup> | 3.84±0.06 <sup>b</sup>  | 8.33±0.12 <sup>b</sup>  | 9.08±0.21 <sup>ab</sup> | 5.62±0.12 <sup>ab</sup> | 4.43±0.10 <sup>b</sup> | 5.95±0.11 <sup>c</sup>   | 7.49±0.30 <sup>bc</sup>  | 0.77±0.03 <sup>a</sup> | 3.58±0.06 <sup>b</sup> | 5.84±0.13 <sup>b</sup> | 1.99±0.08 <sup>b</sup>  | 3.60±0.07 <sup>ab</sup> | 0.51±0.02 <sup>a</sup> | 1.49±0.05 <sup>bc</sup> | 5.42±0.18 <sup>b</sup>  | 8.85±0.32 <sup>b</sup>  | 0.21±0.02 <sup>d</sup> |
| Average of 0-2 week | 5.89±0.20               | 3.47±0.12               | 7.64±0.05               | 8.63±0.02               | 5.59±0.18               | 4.16±0.01              | 5.43±0.15                | 6.82±0.19                | 0.84±0.03              | 3.34±0.04              | 5.60±0.03              | 2.37±0.38               | 3.69±0.11               | 0.93±0.05              | 1.55±0.15               | 5.42±0.18               | 8.25±0.08               | 0.42±0.09              |
| Average of 3-6 week | 5.70±0.20               | 3.59±0.22               | 7.67±0.47               | 8.85±0.41               | 5.25±0.28               | 4.40±0.56              | 5.58±0.37                | 7.29±0.25                | 0.81±0.03              | 3.57±0.06              | 5.73±0.28              | 2.19±0.35               | 3.54±0.11               | 0.58±0.05              | 1.62±0.15               | 5.09±0.37               | 8.27±0.41               | 0.27±0.07              |

<sup>1</sup> Values are means ± SE, n = 6. Means in a row with different superscripts are different,  $P < 0.05$ .
